# Supplementary material for: Structural Characteristics, Stability, and Electronic Properties of 001 Surface with Point Defects of Zinc Stannate: A First-Principle Study
Source: MDPI journal article supplement (doi:10.3390/inorganics10120258), 2022-12-13
Supplement: s1 [file s1]

## *Supporting materials*

### **Structural stability characteristics and electronic properties of 001 surface with point defects of Zinc Stannate: A first-principle study**

Jun Li<sup>1</sup>, Meilin Zhu<sup>2</sup>, Rou Feng<sup>3\*</sup>, Yingjie Yuan<sup>1</sup>, Zewei Fu<sup>1</sup>, Liangliang Meng<sup>3</sup>, Yingwu Wang<sup>4</sup>, Ying Zhou<sup>4</sup>, Hui Zhang<sup>3</sup>, and Hongcun Bai<sup>3\*</sup>

1. Yunnan Tin Industry Group (Holding) Co. Ltd. R & D Center, Kunming, 650200, China

2. College of Basic Medical Sciences, Ningxia Medical University, Yinchuan 750004, China

3. State Key Laboratory of High-Efficiency Utilization of Coal and Green Chemical Engineering, College of Chemistry and Chemical Engineering, Ningxia University, Yinchuan, Ningxia 750021, China

4. Yunnan Provincial Academy of Science and Technology, No. 488 Dianchi Road, Kunming, Yunnan 650051, China

\* Corresponding authors: R. Feng (Email: fengrou0603@163.com), H. Bai (E-mail: hongcunbai@nxu.edu.cn)

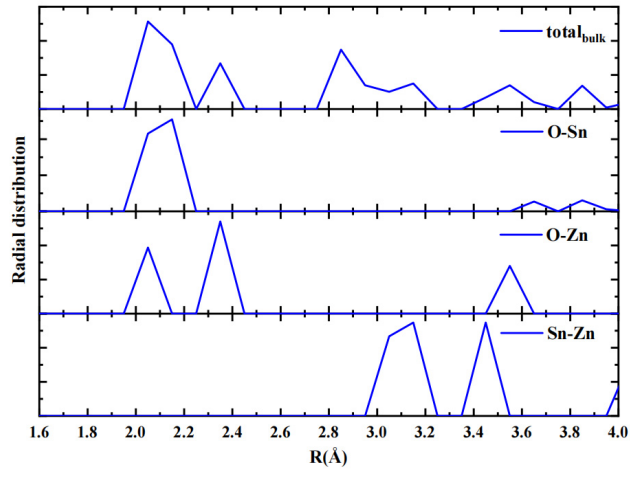

**Figure S1.** The radial distribution functions of zinc stannate bulk

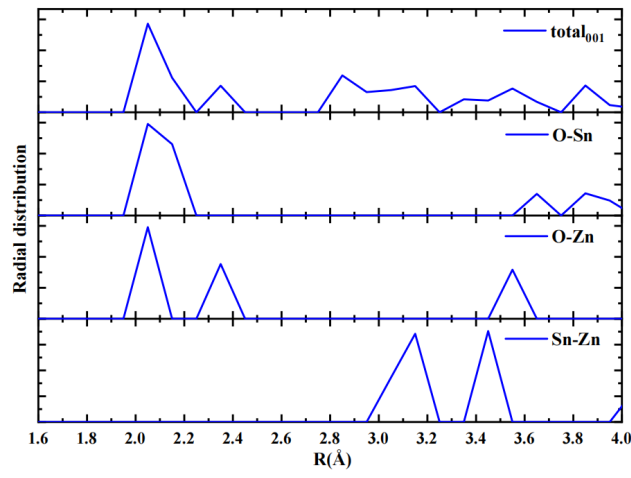

**Figure S2.** The radial distribution functions of the 001 perfect surface

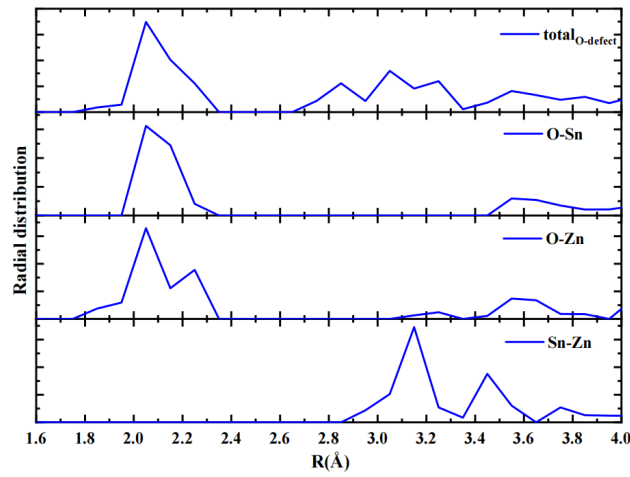

**Figure S3.** The radial distribution functions of the O defect

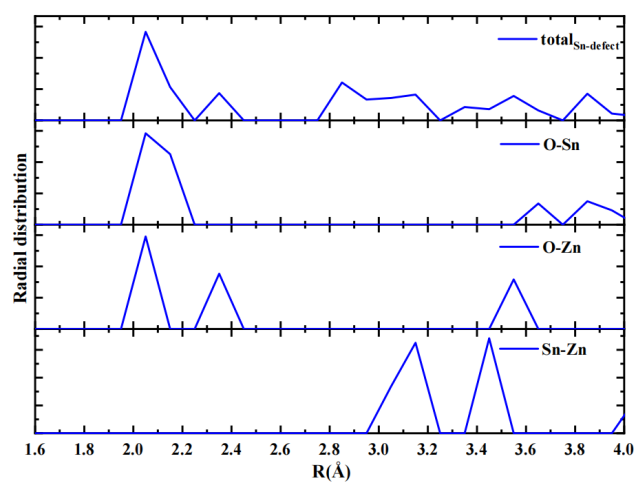

**Figure S4.** The radial distribution functions of the Sn defect

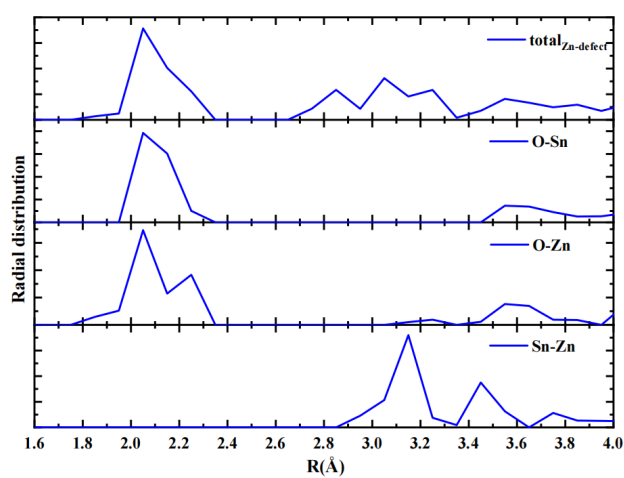

**Figure S5.** The radial distribution functions of the Zn defect

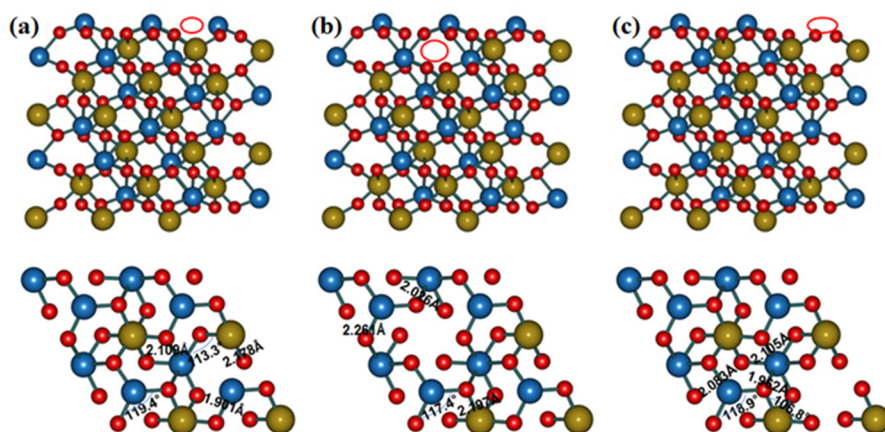

**Figure S6.** Structures of O defect (a), Sn defect (b), Zn defect (c) on 001 surface of ZS. The defect locations are marked with red circles. Below the three defect models correspond to the top view of defects after structure optimization.

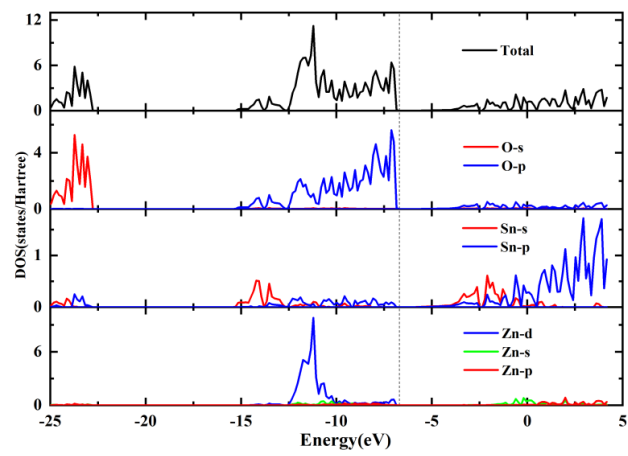

**Figure S7.** Total and Partial Density of States of ZnSnO<sub>3</sub> Bulk
